# Supplementary material for: Rate coefficients of H-atom abstraction from ethers and isomerization of alkoxyalkylperoxy radicals
Source: Royal Society of Chemistry journal article supplement (doi:10.1039/b706388a), 2007-01-01
Supplement: b706388a.pdf [file b706388a.pdf]

This is supplementary information for the paper titled “A Systematic Study of Rate Constants of the Important Reactions for Ether Oxidation.”

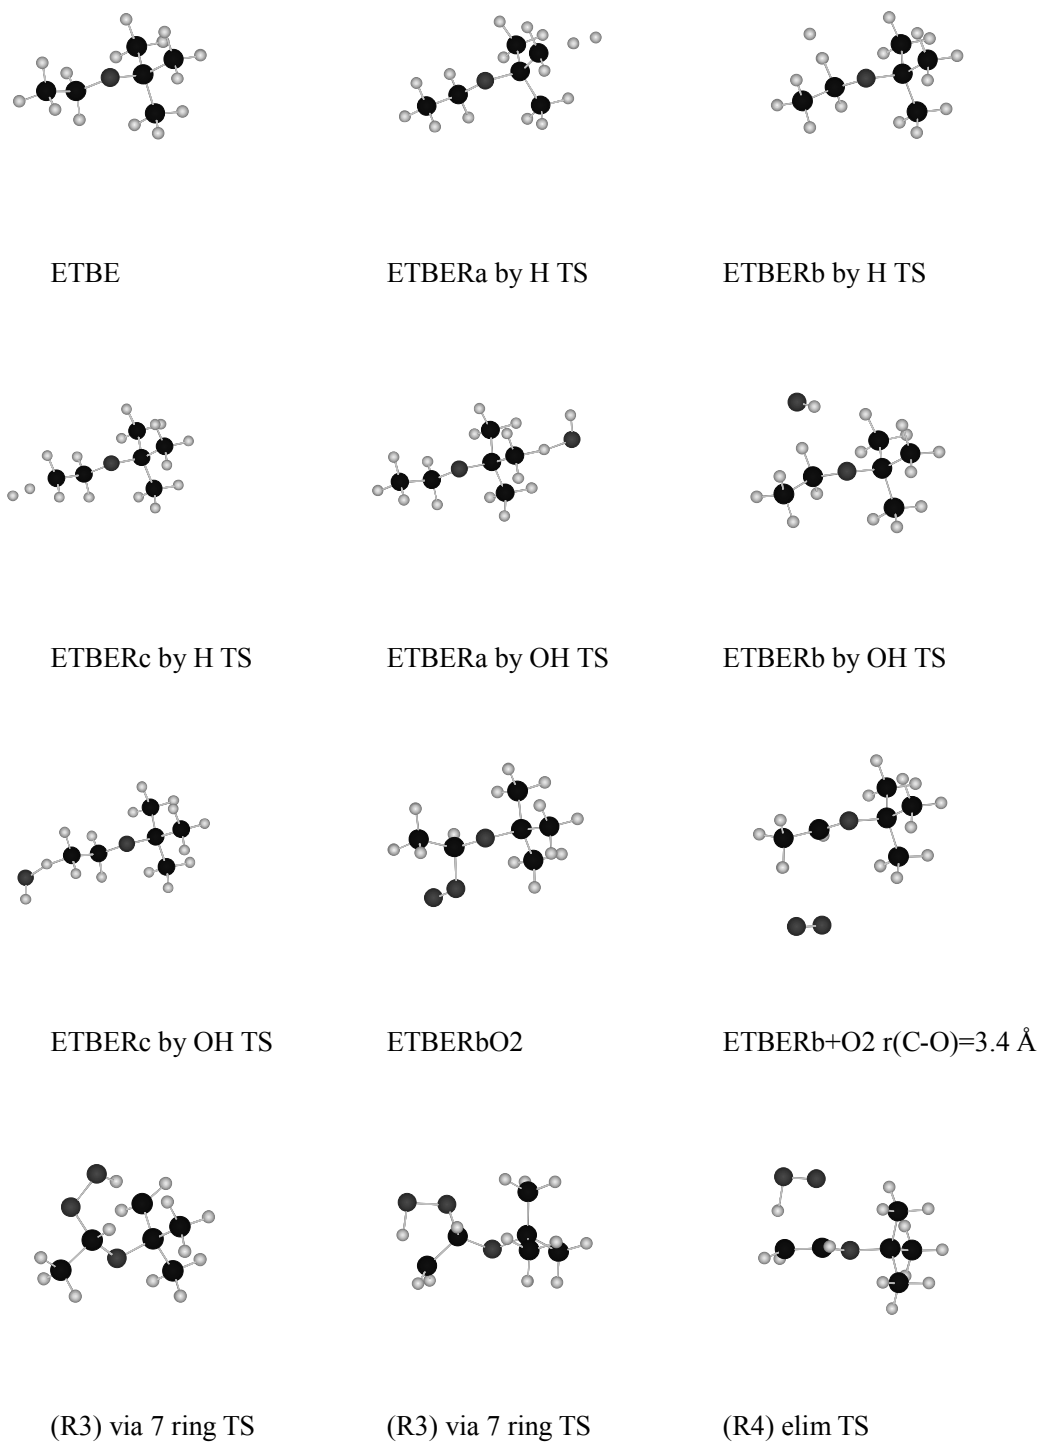

Fig. A The B3LYP/6-31G(d) optimized geometries for species related (R1-4) for ETBE.

Table A. The B3LYP/6-31G(d) unscaled harmonic vibrational frequencies, the rotational constants, and the G3MP2B3 energies at 0 K for species related (R1-4) for ETBE.

| Species           | Energies<br>(hatee) | Rotational<br>Constants<br>(GHz) | Frequencies (cm <sup>-1</sup> ) |            |            |            |            |            |
|-------------------|---------------------|----------------------------------|---------------------------------|------------|------------|------------|------------|------------|
| ETBE              | -311.743576         | 4.05705                          | 40.2761,                        | 104.6543,  | 195.7651,  | 213.2811,  | 256.7075,  | 265.3654,  |
|                   |                     | 1.54910                          | 276.7453,                       | 329.0799,  | 343.0597,  | 356.0810,  | 447.6345,  | 458.4671,  |
|                   |                     | 1.52354                          | 514.9152,                       | 746.1530,  | 835.9531,  | 859.1761,  | 917.7222,  | 929.0219,  |
|                   |                     |                                  | 971.8189,                       | 977.3312,  | 1052.5800, | 1058.2118, | 1106.5741, | 1158.1388, |
|                   |                     |                                  | 1198.0656,                      | 1242.8764, | 1266.9397, | 1289.9366, | 1317.8712, | 1418.4005, |
|                   |                     |                                  | 1424.5142,                      | 1427.9729, | 1449.0682, | 1453.5892, | 1504.9477, | 1513.8465, |
|                   |                     |                                  | 1515.6689,                      | 1517.8403, | 1529.3622, | 1532.1441, | 1534.6190, | 1547.9425, |
|                   |                     |                                  | 1563.7454,                      | 3000.0185, | 3027.8449, | 3051.2287, | 3052.8521, | 3057.2172, |
|                   |                     |                                  | 3060.8056,                      | 3116.6565, | 3121.1270, | 3124.2251, | 3125.6592, | 3127.6726, |
|                   |                     |                                  | 3132.6178,                      | 3133.0295, | 3134.3562  |            |            |            |
| ETBERa<br>by H TS | -312.227118         | 4.05147                          | -1193.9664,                     | -3.3400,   | 58.7620,   | 136.5363,  | 181.3259,  | 240.8258,  |
|                   |                     | 1.47103                          | 263.8531,                       | 271.0339,  | 288.4766,  | 330.5494,  | 335.4546,  | 373.5464,  |
|                   |                     | 1.44870                          | 447.8519,                       | 456.6517,  | 531.0108,  | 600.9830,  | 749.2966,  | 835.3994,  |
|                   |                     |                                  | 852.9108,                       | 918.8991,  | 943.0344,  | 969.2848,  | 976.1907,  | 1026.1371, |
|                   |                     |                                  | 1049.9872,                      | 1091.2504, | 1150.4660, | 1191.3128, | 1198.8042, | 1228.6717, |
|                   |                     |                                  | 1240.3856,                      | 1274.0398, | 1296.9324, | 1313.5302, | 1417.8321, | 1425.5594, |
|                   |                     |                                  | 1437.1139,                      | 1449.9842, | 1482.9817, | 1513.3929, | 1513.9606, | 1522.6348, |
|                   |                     |                                  | 1530.0730,                      | 1534.6681, | 1541.0261, | 1561.2297, | 1804.2083, | 3002.9697, |
|                   |                     |                                  | 3032.5316,                      | 3054.8156, | 3057.5976, | 3059.6640, | 3114.6737, | 3123.0825, |
|                   |                     |                                  | 3127.2511,                      | 3127.7363, | 3129.3203, | 3131.2491, | 3135.7155, | 3198.3222, |
| ETBERb<br>by H TS | -312.237176         | 3.83773                          | -1029.4885,                     | 49.1921,   | 109.6928,  | 196.4068,  | 203.1378,  | 226.0420,  |
|                   |                     | 1.53291                          | 254.9431,                       | 269.8127,  | 319.5872,  | 332.8309,  | 339.1149,  | 370.6450,  |
|                   |                     | 1.48832                          | 385.0967,                       | 449.5366,  | 463.8577,  | 518.3915,  | 746.5563,  | 858.2266,  |
|                   |                     |                                  | 889.8509,                       | 922.2449,  | 932.6750,  | 972.5432,  | 990.6501,  | 1055.2937, |
|                   |                     |                                  | 1060.3089,                      | 1105.7867, | 1169.8777, | 1191.0332, | 1235.4479, | 1272.8227, |
|                   |                     |                                  | 1291.9152,                      | 1296.8700, | 1347.2635, | 1411.0673, | 1425.1227, | 1427.6113, |
|                   |                     |                                  | 1434.4381,                      | 1452.3289, | 1458.2720, | 1503.6055, | 1510.0957, | 1513.0623, |
|                   |                     |                                  | 1516.4530,                      | 1526.2839, | 1529.3533, | 1531.2459, | 1547.7671, | 3040.4937, |
|                   |                     |                                  | 3051.6041,                      | 3054.9300, | 3056.5651, | 3063.7606, | 3118.5044, | 3120.1859, |
|                   |                     |                                  | 3125.9518,                      | 3128.3331, | 3133.7179, | 3134.9867, | 3136.4326, | 3138.3014  |

|         |             |         |             |            |            |            |            |            |
|---------|-------------|---------|-------------|------------|------------|------------|------------|------------|
| ETBERc  | -312.226824 | 4.00467 | -1204.3880, | 33.3689,   | 81.6430,   | 134.5086,  | 170.3632,  | 212.9021,  |
| by H TS |             | 1.44932 | 255.6327,   | 271.4229,  | 286.7334,  | 342.0113,  | 344.4929,  | 360.0075,  |
|         |             | 1.42137 | 454.4277,   | 465.1758,  | 513.8719,  | 591.7841,  | 752.0191,  | 838.4695,  |
|         |             |         | 874.6255,   | 918.0805,  | 930.3571,  | 972.0834,  | 989.7373,  | 1052.0906, |
|         |             |         | 1053.0543,  | 1084.7169, | 1100.3731, | 1193.4693, | 1237.3267, | 1237.5429, |
|         |             |         | 1240.8785,  | 1267.1801, | 1288.5708, | 1315.7702, | 1412.0617, | 1425.8615, |
|         |             |         | 1431.4807,  | 1452.7357, | 1497.9729, | 1504.5421, | 1514.0713, | 1517.4874, |
|         |             |         | 1532.0862,  | 1532.5450, | 1546.3696, | 1556.7464, | 1761.5689, | 3009.6994, |
|         |             |         | 3040.5851,  | 3052.4890, | 3053.3124, | 3061.3079, | 3116.2269, | 3119.3653, |
|         |             |         | 3121.0880,  | 3124.7246, | 3126.0776, | 3133.3965, | 3134.4909, | 3202.7013  |
| ETBERa  | -387.397325 | 3.95485 | -1170.2837, | 41.5334,   | 95.0872,   | 136.5363,  | 181.3259,  | 240.8258,  |
| by OH   |             | 0.88041 | 263.8531,   | 271.0339,  | 288.4766,  | 330.5494,  | 335.4546,  | 373.5464,  |
| TS      |             | 0.86925 | 447.8519,   | 456.6517,  | 531.0108,  | 600.9830,  | 749.2966,  | 835.3994,  |
|         |             |         | 852.9108,   | 918.8991,  | 943.0344,  | 969.2848,  | 976.1907,  | 1026.1371, |
|         |             |         | 1049.9872,  | 1091.2504, | 1150.4660, | 1191.3128, | 1198.8042, | 1228.6717, |
|         |             |         | 1240.3856,  | 1274.0398, | 1296.9324, | 1313.5302, | 1417.8321, | 1425.5594, |
|         |             |         | 1437.1139,  | 1449.9842, | 1482.9817, | 1513.3929, | 1513.9606, | 1522.6348, |
|         |             |         | 1530.0730,  | 1534.6681, | 1541.0261, | 1561.2297, | 1804.2083, | 3002.9697, |
|         |             |         | 3032.5316,  | 3054.8156, | 3057.5976, | 3059.6640, | 3114.6737, | 3123.0825, |
|         |             |         | 3127.2511,  | 3127.7363, | 3129.3203, | 3131.2491, | 3135.7155, | 3198.3222  |
| ETBERb  | -387.400922 | 2.26389 | -158.2527,  | 61.5925,   | 89.5197,   | 96.6129,   | 143.1015,  | 194.5047,  |
| by OH   |             | 1.29938 | 207.9510,   | 242.1737,  | 255.9714,  | 264.1427,  | 311.6528,  | 335.5402,  |
| TS      |             | 1.04452 | 347.2676,   | 354.2351,  | 441.1794,  | 463.8590,  | 511.3456,  | 642.6192,  |
|         |             |         | 744.7525,   | 818.7139,  | 855.5175,  | 924.9845,  | 931.1124,  | 972.7125,  |
|         |             |         | 976.7306,   | 1054.1197, | 1061.1702, | 1105.3215, | 1144.6959, | 1180.0758, |
|         |             |         | 1233.8233,  | 1270.2696, | 1292.7221, | 1296.1990, | 1399.1568, | 1426.6031, |
|         |             |         | 1431.4937,  | 1440.6235, | 1456.4633, | 1495.5922, | 1505.2121, | 1511.8928, |
|         |             |         | 1514.2445,  | 1516.1992, | 1527.4287, | 1530.5127, | 1532.9869, | 1547.0380, |
|         |             |         | 2490.8206,  | 3033.1842, | 3052.8446, | 3055.5680, | 3059.1036, | 3063.0751, |
|         |             |         | 3117.7269,  | 3123.0596, | 3128.0864, | 3128.6808, | 3130.4319, | 3135.2628, |
|         |             |         | 3137.2190,  | 3145.0874, | 3661.8053  |            |            |            |
| ETBERc  | -387.396095 | 3.64211 | -1259.4768, | 22.4198,   | 43.2212,   | 58.2846,   | 108.5530,  | 120.8348,  |
| by OH   |             | 0.77709 | 191.8189,   | 210.3741,  | 258.0327,  | 272.3794,  | 306.6763,  | 338.0052,  |
| TS      |             | 0.75637 | 350.6275,   | 394.4851,  | 444.7182,  | 452.8226,  | 505.8881,  | 669.9822,  |
|         |             |         | 747.9614,   | 819.1798,  | 848.1122,  | 907.9599,  | 917.5007,  | 929.7065,  |
|         |             |         | 970.0673,   | 988.9045,  | 1050.3564, | 1055.5940, | 1086.0558, | 1124.8180, |

|           |             |           |                                                                                                                                                                                                                                                                                                                                                                           |
|-----------|-------------|-----------|---------------------------------------------------------------------------------------------------------------------------------------------------------------------------------------------------------------------------------------------------------------------------------------------------------------------------------------------------------------------------|
|           |             |           | 1197.3679, 1236.4231, 1249.8351, 1268.2904, 1290.5182, 1311.5971, 1415.0468, 1422.8975, 1431.5887, 1448.8955, 1451.0252, 1498.9854, 1502.7777, 1515.0254, 1517.9646, 1530.3250, 1531.5213, 1547.1453, 1557.2158, 3018.9498, 3047.7821, 3053.2390, 3056.7904, 3061.2395, 3100.8796, 3117.1197, 3121.8238, 3124.5341, 3127.2885, 3133.1049, 3133.8544, 3176.0608, 3687.2006 |
| ETBERb    | -461.323073 | 2.5133436 | 43.6674, 62.4007, 116.1011, 195.4875, 213.5449, 247.2532,                                                                                                                                                                                                                                                                                                                 |
| O2        |             | 1.0539884 | 263.0098, 283.5659, 286.1068, 312.4978, 331.9974, 368.4906,                                                                                                                                                                                                                                                                                                               |
|           |             | 0.9180796 | 399.1014, 446.7447, 473.1844, 516.8258, 572.3425, 745.8508,                                                                                                                                                                                                                                                                                                               |
|           |             |           | 811.9332, 862.3206, 924.1778, 935.9391, 975.9937, 982.5220,                                                                                                                                                                                                                                                                                                               |
|           |             |           | 1057.9311, 1063.0114, 1085.2583, 1157.0626, 1201.6160, 1213.4071,                                                                                                                                                                                                                                                                                                         |
|           |             |           | 1237.2752, 1277.1646, 1299.5665, 1351.7513, 1403.6651, 1427.0520,                                                                                                                                                                                                                                                                                                         |
|           |             |           | 1430.6191, 1438.6711, 1455.9066, 1504.2483, 1512.1170, 1516.0663,                                                                                                                                                                                                                                                                                                         |
|           |             |           | 1516.5461, 1517.8152, 1530.4421, 1532.5993, 1547.3722, 3052.9232,                                                                                                                                                                                                                                                                                                         |
|           |             |           | 3058.5107, 3065.0863, 3072.5244, 3090.3307, 3118.9268, 3127.3319,                                                                                                                                                                                                                                                                                                         |
|           |             |           | 3129.4935, 3136.5367, 3136.8867, 3147.0751, 3148.5787, 3161.2578                                                                                                                                                                                                                                                                                                          |
| ETBERb    | -461.961718 | 2.1921046 | -86.6146, 29.5815, 49.3606, 69.3826, 117.3455, 143.6009,                                                                                                                                                                                                                                                                                                                  |
| +O2       | (B3LYP      | 0.7794439 | 188.0203, 190.7641, 218.9365, 234.4242, 258.0559, 269.0751,                                                                                                                                                                                                                                                                                                               |
| r(C-O)=   | Energy)*    | 0.6784351 | 325.1849, 338.7542, 359.4959, 372.2150, 456.5732, 459.5120,                                                                                                                                                                                                                                                                                                               |
| 3.4 Å     |             |           | 521.8090, 748.4338, 857.6981, 926.6546, 936.8304, 976.8937,                                                                                                                                                                                                                                                                                                               |
|           |             |           | 978.1704, 1025.7846, 1058.9864, 1063.3098, 1158.5403, 1211.2036,                                                                                                                                                                                                                                                                                                          |
|           |             |           | 1258.0697, 1276.2454, 1298.4674, 1423.5456, 1428.6856, 1431.8345,                                                                                                                                                                                                                                                                                                         |
|           |             |           | 1455.4456, 1459.4364, 1491.8616, 1494.9561, 1503.5816, 1512.0202,                                                                                                                                                                                                                                                                                                         |
|           |             |           | 1515.0524, 1525.3112, 1528.6321, 1535.4400, 1545.1517, 2863.8654,                                                                                                                                                                                                                                                                                                         |
|           |             |           | 3057.8746, 3060.5133, 3067.3524, 3070.3748, 3124.9594, 3127.2403,                                                                                                                                                                                                                                                                                                         |
|           |             |           | 3131.2261, 3133.7513, 3137.8541, 3138.5631, 3142.9017, 3213.3191                                                                                                                                                                                                                                                                                                          |
| (R3) via  | -461.286112 | 2.23368   | -1515.3695, 98.9427, 144.9837, 201.5339, 210.7699, 227.7565,                                                                                                                                                                                                                                                                                                              |
| 7 ring TS |             | 1.30497   | 275.9843, 287.1751, 297.8995, 312.7542, 362.7623, 417.5634,                                                                                                                                                                                                                                                                                                               |
|           |             | 1.03807   | 439.8745, 467.2742, 524.3416, 551.5622, 621.6843, 654.5668,                                                                                                                                                                                                                                                                                                               |
|           |             |           | 759.0027, 851.0001, 867.2490, 908.7414, 919.7059, 951.2724,                                                                                                                                                                                                                                                                                                               |
|           |             |           | 972.8041, 988.2274, 1019.8226, 1054.5897, 1110.3149, 1139.3403,                                                                                                                                                                                                                                                                                                           |
|           |             |           | 1174.5606, 1209.1080, 1235.6799, 1269.9522, 1281.7253, 1373.6141,                                                                                                                                                                                                                                                                                                         |
|           |             |           | 1406.7130, 1421.7790, 1434.8697, 1439.5410, 1464.6073, 1503.9460,                                                                                                                                                                                                                                                                                                         |
|           |             |           | 1507.2857, 1513.1132, 1516.4424, 1519.6893, 1526.2934, 1545.3682,                                                                                                                                                                                                                                                                                                         |
|           |             |           | 3054.8758, 3061.9892, 3076.4407, 3077.5155, 3114.0473, 3124.7089,                                                                                                                                                                                                                                                                                                         |
|           |             |           | 3130.7478, 3140.8462, 3148.2396, 3155.4873, 3158.5360, 3207.5873                                                                                                                                                                                                                                                                                                          |

|           |             |         |             |            |            |            |            |            |
|-----------|-------------|---------|-------------|------------|------------|------------|------------|------------|
| (R3) via  | -461.265152 | 2.91292 | -2012.4700, | 47.9470,   | 89.1560,   | 130.2852,  | 199.5118,  | 218.1208,  |
| 5 ring TS |             | 0.9669  | 257.2017,   | 265.7531,  | 298.2075,  | 323.8206,  | 346.4538,  | 392.7432,  |
|           |             | 0.88424 | 404.0190,   | 464.3867,  | 496.5945,  | 531.1705,  | 584.5722,  | 672.6971,  |
|           |             |         | 758.4408,   | 874.0999,  | 877.6044,  | 925.4665,  | 936.5312,  | 956.2972,  |
|           |             |         | 976.7358,   | 983.1219,  | 1022.1545, | 1059.6747, | 1062.7542, | 1089.5653, |
|           |             |         | 1130.0644,  | 1186.5311, | 1230.6600, | 1275.9592, | 1297.4979, | 1341.0025, |
|           |             |         | 1409.9643,  | 1430.9881, | 1432.7668, | 1457.3663, | 1478.5688, | 1503.5167, |
|           |             |         | 1510.7326,  | 1516.0017, | 1528.9458, | 1532.1729, | 1545.8377, | 1734.7021, |
|           |             |         | 3044.3325,  | 3056.1406, | 3058.4548, | 3065.5966, | 3121.0375, | 3127.7733, |
|           |             |         | 3129.6641,  | 3135.1619, | 3136.2527, | 3138.1845, | 3145.1625, | 3230.4551  |
| (R4)      | -461.277106 | 2.51922 | -1072.7784, | 41.5195,   | 94.2556,   | 127.0954,  | 134.5690,  | 196.8480,  |
| elim TS   |             | 0.92802 | 207.2587,   | 257.6517,  | 267.3532,  | 329.3860,  | 340.6159,  | 344.6520,  |
|           |             | 0.82085 | 356.0999,   | 447.3493,  | 463.6307,  | 476.0098,  | 536.6834,  | 591.9307,  |
|           |             |         | 646.7190,   | 751.9511,  | 852.7958,  | 915.4278,  | 928.7612,  | 936.0337,  |
|           |             |         | 978.6794,   | 1004.6410, | 1059.9902, | 1062.7732, | 1065.8070, | 1208.4625, |
|           |             |         | 1254.8964,  | 1280.0592, | 1296.5259, | 1301.4975, | 1326.9565, | 1338.6983, |
|           |             |         | 1430.1553,  | 1433.7365, | 1458.5650, | 1464.3977, | 1502.1919, | 1508.5351, |
|           |             |         | 1514.1841,  | 1528.1131, | 1530.8403, | 1543.9857, | 1610.4688, | 1639.6454, |
|           |             |         | 3057.5460,  | 3062.5676, | 3070.1256, | 3125.2907, | 3132.3460, | 3133.6956, |
|           |             |         | 3136.6786,  | 3139.7582, | 3141.1677, | 3157.6091, | 3207.0481, | 3224.5487  |

\* Energy of effective TS of ETBERb+O2 was calculated by only B3LYP/6-31G(d) method. Activation energy was calculated as the difference of the sum of SPE and ZPE by B3LYP/6-31G(d) method between effective TS and ETBERbO2.

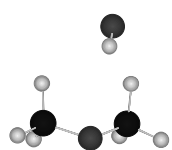

DME(p)

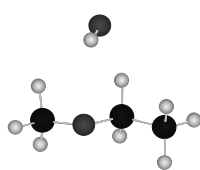

EME(s)

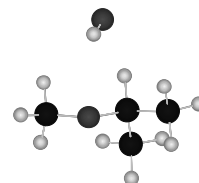

IPME(t)

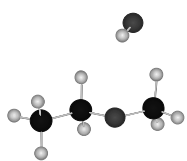

EME(p)

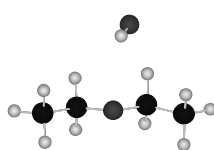

DEE(s)

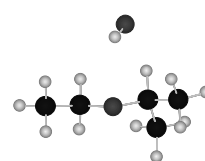

IPEE(t)

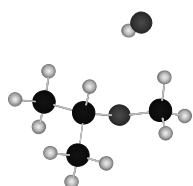

IPME(p)

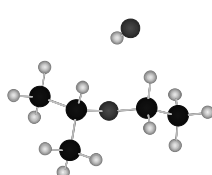

IPEE(s)

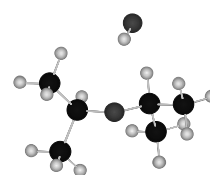

DIPE(t)

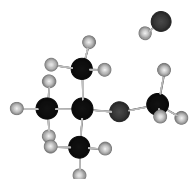

MTBE(p)

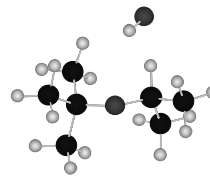

IPTBE(t)

Fig. B The B3LYP/6-31G(d) optimized geometries for TS of (R1) by OH radical for ethers except for ETBE.

Table B. The B3LYP/6-31G(d) unscaled harmonic vibrational frequencies, the rotational constants, and the energies at 0 K by each calculation methods for TS of (R1) by OH radical for ethers except for ETBE.

| Species | Energies<br>(hatee) | Rotational<br>Constants<br>(GHz) | Frequencies (cm <sup>-1</sup> ) |            |            |            |            |            |
|---------|---------------------|----------------------------------|---------------------------------|------------|------------|------------|------------|------------|
| DME(p)  | -230.436290         | 9.30460                          | -133.0808,                      | 104.8811,  | 139.8082,  | 240.8709,  | 278.9559,  | 304.9217,  |
|         | (G3MP2B3)           | 4.16162                          | 423.3807,                       | 517.6553,  | 952.3093,  | 1119.3937, | 1171.9944, | 1197.5728, |
|         | -230.40252          | 3.23164                          | 1211.6640,                      | 1276.0249, | 1477.0133, | 1486.3442, | 1507.7669, | 1517.7512, |
|         | (CBS-QB3)           |                                  | 1520.5387,                      | 1542.6966, | 2769.6902, | 3002.2850, | 3018.7558, | 3055.5639, |
|         | -230.425821         |                                  | 3137.3776,                      | 3143.2518, | 3652.6739  |            |            |            |
|         | (G3MP2)             |                                  |                                 |            |            |            |            |            |
| EME(s)  | -269.678114         | 4.19139                          | -150.1805,                      | 74.7710,   | 138.4028,  | 148.3401,  | 223.6611,  | 252.6703,  |
|         | -269.63433          | 3.68274                          | 297.1638,                       | 322.5548,  | 472.5933,  | 575.0359,  | 826.5312,  | 876.4242,  |
|         | -269.667672         | 2.17117                          | 1037.5444,                      | 1125.4483, | 1149.3221, | 1173.9343, | 1198.6831, | 1248.1789, |
|         |                     |                                  | 1297.3293,                      | 1408.7457, | 1444.7440, | 1495.9165, | 1512.5529, | 1513.3261, |
|         |                     | 1516.5065,                       | 1535.7888,                      | 1545.0630, | 2677.0035, | 2994.5733, | 3008.5997, |            |
|         |                     | 3060.5717,                       | 3062.6047,                      | 3132.5345, | 3136.0876, | 3142.8615, | 3653.1816  |            |
| IPME(t) | -308.919989         | 3.09470                          | -108.4915,                      | 77.4149,   | 111.4047,  | 145.9504,  | 195.2463,  | 211.5685,  |
|         | -308.86557          | 2.56677                          | 255.5919,                       | 291.5219,  | 349.0167,  | 370.1182,  | 461.0125,  | 489.2374,  |
|         | -308.908592         | 1.90816                          | 559.7980,                       | 805.7497,  | 924.1130,  | 938.0798,  | 959.5159,  | 1104.7883, |
|         |                     |                                  | 1148.3750,                      | 1167.1997, | 1189.4027, | 1209.6784, | 1238.7858, | 1353.2420, |
|         |                     | 1384.6690,                       | 1423.0615,                      | 1441.8918, | 1493.8024, | 1508.1849, | 1510.4072, |            |
|         |                     | 1521.1155,                       | 1526.1510,                      | 1538.3363, | 1542.1828, | 2686.7756, | 3015.5542, |            |
|         |                     | 3051.9751,                       | 3059.7595,                      | 3075.3700, | 3122.5490, | 3130.0934, | 3132.2808, |            |
|         |                     | 3136.3049,                       | 3139.6572,                      | 3651.5797  |            |            |            |            |
| EME(p)  | -269.677567         | 5.83555                          | -127.9092,                      | 78.8948,   | 110.4954,  | 141.6203,  | 236.0601,  | 265.1420,  |
|         | -269.63327          | 2.61968                          | 288.9805,                       | 312.3447,  | 463.4013,  | 532.7148,  | 836.2631,  | 869.5978,  |
|         | -269.665316         | 1.99344                          | 1038.6182,                      | 1119.8850, | 1148.1796, | 1178.8793, | 1205.2749, | 1242.7055, |
|         |                     |                                  | 1315.5678,                      | 1421.1155, | 1451.9081, | 1476.7331, | 1501.2081, | 1514.3396, |
|         |                     | 1518.3419,                       | 1531.3140,                      | 1557.6826, | 2752.1581, | 2990.4354, | 3018.5944, |            |
|         |                     | 3025.0500,                       | 3059.8403,                      | 3130.4859, | 3134.8352, | 3136.0209, | 3654.3840  |            |
| DEE(s)  | -308.919502         | 3.60380                          | -147.6197,                      | 66.7043,   | 88.4393,   | 123.0689,  | 152.2162,  | 193.7323,  |
|         | -308.86533          | 2.01974                          | 237.0398,                       | 256.7504,  | 326.0418,  | 432.2343,  | 443.1839,  | 584.2401,  |
|         | -308.907121         | 1.43708                          | 821.5289,                       | 837.7530,  | 863.8782,  | 954.2553,  | 1062.5677, | 1106.1557, |

|         |             |         |            |            |            |            |            |            |
|---------|-------------|---------|------------|------------|------------|------------|------------|------------|
|         |             |         | 1146.7791, | 1170.4598, | 1192.3112, | 1207.0079, | 1295.0857, | 1314.6572, |
|         |             |         | 1392.2308, | 1424.8517, | 1439.0093, | 1462.8138, | 1511.8431, | 1513.1411, |
|         |             |         | 1515.1151, | 1531.0089, | 1535.7063, | 1558.0279, | 2661.8844, | 2992.1666, |
|         |             |         | 2999.9162, | 3033.2626, | 3059.4925, | 3060.2372, | 3130.1831, | 3131.7015, |
|         |             |         | 3134.6723, | 3135.6910, | 3654.7226  |            |            |            |
| IPEE(t) | -348.161339 | 2.54536 | -105.4577, | 60.6374,   | 92.4243,   | 113.1942,  | 149.5748,  | 189.2167,  |
|         | -348.09674  | 1.65000 | 214.5935,  | 247.5287,  | 263.6782,  | 340.0081,  | 344.8491,  | 397.7804,  |
|         | -348.148129 | 1.29433 | 472.8194,  | 497.2927,  | 568.3568,  | 817.5557,  | 838.6623,  | 898.6827,  |
|         |             |         | 940.4976,  | 959.9096,  | 988.1584,  | 1096.8528, | 1130.4847, | 1161.6848, |
|         |             |         | 1186.2378, | 1203.0103, | 1209.8926, | 1319.6278, | 1347.9016, | 1382.5702, |
|         |             |         | 1420.1726, | 1427.0066, | 1442.7823, | 1453.8686, | 1509.5132, | 1512.2735, |
|         |             |         | 1514.8572, | 1524.6685, | 1530.3124, | 1537.1195, | 1555.2188, | 2670.6137, |
|         |             |         | 3009.8726, | 3045.8560, | 3053.4114, | 3057.7672, | 3059.5346, | 3122.2040, |
|         |             |         | 3128.1161, | 3129.6351, | 3133.3640, | 3136.0345, | 3139.2631, | 3653.1470  |
| IPME    | -308.918926 | 3.91985 | -134.0497, | 50.6874,   | 79.6417,   | 140.9242,  | 207.5608,  | 235.4567,  |
| (p)     | -308.86426  | 2.03939 | 245.0799,  | 268.2814,  | 320.6214,  | 362.8784,  | 448.8700,  | 493.0547,  |
|         | -308.904929 | 1.65860 | 561.5047,  | 806.6179,  | 920.4082,  | 941.4571,  | 957.2555,  | 1117.9406, |
|         |             |         | 1143.7079, | 1161.1143, | 1176.5483, | 1209.2624, | 1241.7431, | 1389.0161, |
|         |             |         | 1401.2383, | 1431.5510, | 1445.7100, | 1467.7932, | 1500.8361, | 1512.5555, |
|         |             |         | 1514.4013, | 1523.1157, | 1528.8728, | 1538.7088, | 2732.8457, | 3016.5821, |
|         |             |         | 3038.2812, | 3053.0825, | 3057.8766, | 3121.9047, | 3124.4215, | 3128.3590, |
|         |             |         | 3132.3037, | 3134.8589, | 3656.0154  |            |            |            |
| IPEE(s) | -348.161041 | 2.67439 | -156.7611, | 44.8671,   | 69.8315,   | 90.6577,   | 149.3033,  | 199.1737,  |
|         | -348.09636  | 1.60611 | 222.6578,  | 246.7023,  | 265.5652,  | 309.0565,  | 343.0722,  | 414.8360,  |
|         | -348.146856 | 1.21315 | 467.5501,  | 478.5392,  | 606.9437,  | 818.4202,  | 822.7900,  | 896.9864,  |
|         |             |         | 939.4589,  | 954.6506,  | 988.8366,  | 1103.4504, | 1132.9591, | 1157.6237, |
|         |             |         | 1176.4450, | 1192.4497, | 1218.5987, | 1291.9500, | 1377.0688, | 1390.4990, |
|         |             |         | 1415.8356, | 1429.8850, | 1441.8667, | 1448.2063, | 1511.2952, | 1512.2716, |
|         |             |         | 1514.2844, | 1515.9384, | 1526.6714, | 1535.7956, | 1541.2837, | 2642.2709, |
|         |             |         | 3018.4618, | 3026.1837, | 3052.1876, | 3057.1335, | 3059.2766, | 3121.3432, |
|         |             |         | 3125.1242, | 3127.9371, | 3130.9280, | 3131.8473, | 3135.2860, | 3655.3915  |
| DIPE(t) | -387.401898 | 2.01267 | -109.9339, | 41.2049,   | 95.7909,   | 102.3036,  | 128.1685,  | 192.8843,  |
|         | -387.32652  | 1.43447 | 211.9957,  | 224.6477,  | 269.8095,  | 275.7024,  | 309.3276,  | 346.8019,  |
|         | -387.387399 | 1.00547 | 366.3104,  | 405.2087,  | 448.1706,  | 482.9269,  | 511.5560,  | 546.3475,  |
|         |             |         | 799.0025,  | 859.4713,  | 922.7533,  | 937.5351,  | 940.5680,  | 953.6839,  |
|         |             |         | 958.9316,  | 1039.3911, | 1134.3725, | 1158.9603, | 1165.8596, | 1183.9159, |



|          |             |         |                                                                                                                                                                                                                                                                                                                                                                                                                                                                                                                                                                                                                                                                   |
|----------|-------------|---------|-------------------------------------------------------------------------------------------------------------------------------------------------------------------------------------------------------------------------------------------------------------------------------------------------------------------------------------------------------------------------------------------------------------------------------------------------------------------------------------------------------------------------------------------------------------------------------------------------------------------------------------------------------------------|
|          |             |         | 1207.6057, 1222.4980, 1348.1167, 1376.2012, 1377.9719, 1410.1271, 1422.9489, 1428.5513, 1441.4137, 1445.1681, 1509.4640, 1510.2561, 1514.7985, 1517.7222, 1525.6436, 1528.5177, 1537.8925, 1540.9625, 2725.1472, 3037.0072, 3051.4790, 3052.7796, 3057.4309, 3060.5569, 3118.0100, 3121.8321, 3126.9346, 3131.1172, 3131.9487, 3135.8027, 3138.0305, 3139.0371, 3660.3711                                                                                                                                                                                                                                                                                         |
| MTBE     | -348.158125 | 3.35210 | -118.3931, 74.4581, 99.8525, 132.3548, 214.1351, 251.0360,                                                                                                                                                                                                                                                                                                                                                                                                                                                                                                                                                                                                        |
| (p)      | -348.09380  | 1.50324 | 252.4873, 264.7405, 266.5690, 286.2211, 340.6412, 368.0363,                                                                                                                                                                                                                                                                                                                                                                                                                                                                                                                                                                                                       |
|          | -348.144256 | 1.36909 | 411.5229, 457.2396, 511.6927, 622.2561, 726.5884, 858.2795, 924.6939, 933.0466, 974.0134, 1054.5976, 1058.8167, 1131.5616, 1167.9228, 1214.1863, 1234.4430, 1271.1775, 1299.7743, 1425.8022, 1430.1417, 1451.8997, 1454.8351, 1494.5266, 1503.3563, 1509.7166, 1513.2636, 1516.2753, 1532.2505, 1533.5025, 1546.3669, 2557.1000, 3044.3742, 3054.0148, 3056.7906, 3063.9330, 3118.0220, 3123.6486, 3128.3745, 3130.0343, 3131.3036, 3135.7759, 3146.1337, 3663.8734                                                                                                                                                                                               |
| IPTBE(t) | -426.639938 | 1.72510 | -98.9462, 75.4042, 105.2105, 114.3415, 135.9114, 191.5233,                                                                                                                                                                                                                                                                                                                                                                                                                                                                                                                                                                                                        |
|          | Not found   | 1.14069 | 202.6482, 212.3214, 254.1444, 263.8337, 274.9849, 302.3877,                                                                                                                                                                                                                                                                                                                                                                                                                                                                                                                                                                                                       |
|          | -426.624648 | 0.92812 | 320.6758, 328.0529, 347.6472, 379.2234, 424.0196, 449.6496, 492.5566, 542.0036, 558.3073, 730.8987, 816.9625, 890.2060, 921.6728, 925.9693, 935.5427, 953.9534, 972.0332, 1024.8197, 1055.7984, 1065.6044, 1153.4909, 1168.7130, 1201.3138, 1233.5073, 1268.6299, 1284.5899, 1336.7379, 1383.7105, 1417.6587, 1425.3301, 1431.5533, 1439.5418, 1455.7074, 1502.0043, 1506.8844, 1510.9688, 1514.0908, 1518.9993, 1522.6383, 1527.8707, 1534.5655, 1540.0762, 1548.5361, 2675.9600, 3052.5361, 3054.1768, 3057.5182, 3060.9777, 3066.1385, 3119.5446, 3120.8613, 3122.6878, 3127.4211, 3131.5606, 3134.3607, 3141.9763, 3143.5260, 3145.8170, 3152.3939, 3656.8535 |

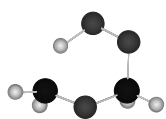

6 ring TS(p)

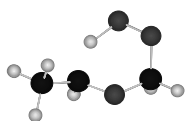

6 ring TS (s)

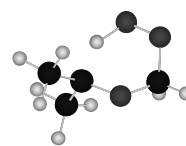

6 ring TS (t)

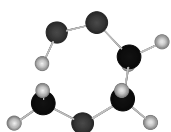

7 ring TS (p adjacent O)

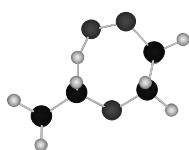

7 ring TS (s ad. O)

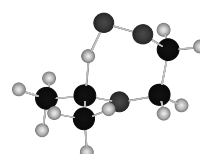

7 ring TS (t ad. O)

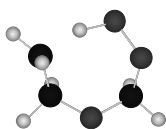

7 ring TS(p)

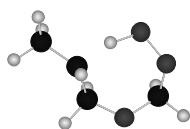

7 ring TS (s)

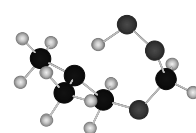

7 ring TS (t)

Fig. C The B3LYP/6-31G(d) optimized geometries for TS of (R3) for ethers.

Table C. The B3LYP/6-31G(d) unscaled harmonic vibrational frequencies, the rotational constants, and the G3MP2B3 energies at 0 K for TS of (R3) for ethers.

| Species              | Energies<br>(hatee) | Rotational<br>Constants<br>(GHz) | Frequencies (cm <sup>-1</sup> ) |            |            |            |            |            |
|----------------------|---------------------|----------------------------------|---------------------------------|------------|------------|------------|------------|------------|
| 6ringTS<br>(p)       | -304.316429         | 8.51750<br>5.18355<br>3.56895    | -1672.4016,                     | 252.0411,  | 402.7260,  | 470.0935,  | 476.8851,  | 590.3327,  |
|                      |                     |                                  | 689.1756,                       | 914.0893,  | 944.6468,  | 1027.3947, | 1121.7986, | 1152.6967, |
|                      |                     |                                  | 1191.2151,                      | 1204.2060, | 1255.4606, | 1315.4217, | 1413.8869, | 1492.1997, |
|                      |                     |                                  | 1513.1537,                      | 1650.2288, | 3047.5093, | 3054.0563, | 3175.1248, | 3204.1187  |
| 6ringTS<br>(s)       | -343.561495         | 6.52074<br>2.60045<br>2.06880    | -1682.6626,                     | 138.5878,  | 188.6605,  | 228.9582,  | 395.2514,  | 416.4710,  |
|                      |                     |                                  | 459.7653,                       | 513.6610,  | 656.3397,  | 876.8292,  | 896.6969,  | 929.4632,  |
|                      |                     |                                  | 989.8373,                       | 1061.1133, | 1129.4157, | 1152.4328, | 1174.0214, | 1206.0469, |
|                      |                     |                                  | 1265.9971,                      | 1309.6185, | 1376.5500, | 1421.8396, | 1440.5326, | 1503.5745, |
|                      |                     |                                  | 1506.3661,                      | 1517.7162, | 1651.8530, | 3031.3056, | 3035.3146, | 3044.6464, |
|                      |                     |                                  | 3107.1558,                      | 3143.1895, | 3169.3828  |            |            |            |
| 6ringTS<br>(t)       | -382.805835         | 3.93123<br>1.90967<br>1.86759    | -1644.9433,                     | 113.9110,  | 174.0669,  | 182.5303,  | 201.7350,  | 257.8160,  |
|                      |                     |                                  | 357.1849,                       | 396.2724,  | 465.3023,  | 485.5367,  | 545.3024,  | 675.2253,  |
|                      |                     |                                  | 814.1023,                       | 924.7024,  | 947.0141,  | 952.5139,  | 985.8046,  | 998.1509,  |
|                      |                     |                                  | 1081.2032,                      | 1148.4105, | 1163.0603, | 1212.7059, | 1245.6840, | 1272.5664, |
|                      |                     |                                  | 1309.1318,                      | 1420.2355, | 1423.4342, | 1437.7556, | 1498.6898, | 1504.4899, |
|                      |                     |                                  | 1511.7826,                      | 1519.7107, | 1525.4922, | 1648.6492, | 3025.6280, | 3034.8350, |
|                      |                     |                                  | 3057.9389,                      | 3106.2002, | 3111.0685, | 3138.7630, | 3145.8017, | 3162.9248  |
| 7ringTS<br>(p ad. O) | -343.546283         | 5.09364<br>3.45524<br>2.30800    | -1786.5145,                     | 169.2307,  | 212.5476,  | 343.7003,  | 378.2386,  | 448.0274,  |
|                      |                     |                                  | 517.2360,                       | 600.1551,  | 622.2094,  | 824.2615,  | 894.0017,  | 950.2924,  |
|                      |                     |                                  | 1022.4283,                      | 1053.5376, | 1097.5194, | 1127.0994, | 1196.8029, | 1233.1832, |
|                      |                     |                                  | 1270.5228,                      | 1301.5131, | 1334.0511, | 1404.2030, | 1424.3233, | 1478.7154, |
|                      |                     |                                  | 1483.6814,                      | 1513.0827, | 1555.6580, | 3026.7855, | 3039.1213, | 3057.5750, |
|                      |                     |                                  | 3113.5034,                      | 3119.4196, | 3189.3355  |            |            |            |
| 7ringTS<br>(s ad. O) | -382.791393         | 4.05765<br>2.01904<br>1.46658    | -1757.8900,                     | 109.2210,  | 174.9505,  | 210.4859,  | 238.8508,  | 292.5006,  |
|                      |                     |                                  | 348.4909,                       | 398.4092,  | 479.2130,  | 550.1426,  | 597.5373,  | 825.6750,  |
|                      |                     |                                  | 876.5472,                       | 898.6933,  | 949.1845,  | 953.5567,  | 1049.4160, | 1082.9122, |
|                      |                     |                                  | 1117.5341,                      | 1130.1764, | 1165.5069, | 1198.7828, | 1283.9334, | 1296.5823, |
|                      |                     |                                  | 1327.0344,                      | 1380.7823, | 1406.9831, | 1430.1935, | 1440.2944, | 1479.0590, |
|                      |                     |                                  | 1504.2861,                      | 1508.3323, | 1519.0285, | 1563.5463, | 3018.1192, | 3024.9925, |
|                      |                     |                                  | 3037.7100,                      | 3055.9190, | 3109.0178, | 3109.4424, | 3115.9598, | 3142.4595  |

|                      |             |                               |                                                                                                                          |                                                                                                                        |                                                                                                                        |                                                                                                                         |                                                                                                                         |                                                                                                                        |
|----------------------|-------------|-------------------------------|--------------------------------------------------------------------------------------------------------------------------|------------------------------------------------------------------------------------------------------------------------|------------------------------------------------------------------------------------------------------------------------|-------------------------------------------------------------------------------------------------------------------------|-------------------------------------------------------------------------------------------------------------------------|------------------------------------------------------------------------------------------------------------------------|
| 7ringTS<br>(t ad. O) | -422.035067 | 2.85228<br>1.56940<br>1.36720 | -1711.3793,<br>291.8896,<br>556.6738,<br>956.2292,<br>1168.3576,<br>1405.7443,<br>1507.5001,<br>3034.1176,<br>3118.2628, | 93.3982,<br>337.2017,<br>592.8151,<br>977.1139,<br>1197.0484,<br>1419.8028,<br>1511.8574,<br>3049.9425,<br>3143.3493,  | 143.7371,<br>363.4879,<br>794.0920,<br>986.5496,<br>1257.0995,<br>1428.4926,<br>1517.9032,<br>3056.5850,               | 194.3446,<br>370.5647,<br>854.1380,<br>1047.9693,<br>1262.0551,<br>1435.4470,<br>1535.6787,<br>3105.5852,               | 203.7131,<br>430.1826,<br>908.8887,<br>1115.5030,<br>1296.2583,<br>1479.1120,<br>1550.3364,<br>3109.8395,               | 215.7472,<br>490.1410,<br>953.1252,<br>1134.1071,<br>1326.6207,<br>1497.6173,<br>3029.5171,<br>3115.6869,<br>3146.8033 |
| 7ringTS<br>(p)       | -343.553885 | 4.99911<br>3.56121<br>2.33879 | -1637.8644,<br>539.3752,<br>998.7976,<br>1251.0108,<br>1491.9560,<br>3119.9040,                                          | 165.0918,<br>581.1000,<br>1001.8968,<br>1310.3638,<br>1497.0570,<br>3145.5362,                                         | 197.4360,<br>660.2165,<br>1044.9339,<br>1346.8047,<br>1511.0198,                                                       | 361.5640,<br>826.6081,<br>1119.8944,<br>1401.7668,<br>3009.2210,                                                        | 401.7664,<br>855.0597,<br>1140.4649,<br>1434.3304,<br>3035.5439,                                                        | 452.6008,<br>914.1184,<br>1187.0968,<br>1459.8338,<br>3057.5702,<br>3213.8130                                          |
| 7ringTS<br>(s)       | -382.795115 | 4.06106<br>2.00017<br>1.45914 | -1708.5793,<br>358.8627,<br>898.0582,<br>1110.9586,<br>1338.1965,<br>1505.2311,<br>3034.2860,                            | 106.2017,<br>442.9225,<br>913.0568,<br>1119.5997,<br>1348.6469,<br>1509.3240,<br>3052.8292,                            | 159.5503,<br>472.3452,<br>929.3208,<br>1157.8205,<br>1413.4349,<br>1515.8368,<br>3083.3580,                            | 193.9228,<br>567.3064,<br>958.8713,<br>1188.9626,<br>1433.0626,<br>1517.9189,<br>3116.7284,                             | 215.7304,<br>634.0149,<br>1005.9258,<br>1251.9375,<br>1438.6168,<br>2999.0294,<br>3131.4657,                            | 293.4808,<br>795.3673,<br>1076.1718,<br>1298.6820,<br>1492.5491,<br>3008.7420,<br>3143.8660                            |
| 7ringTS<br>(t)       | -422.039489 | 2.87795<br>1.54386<br>1.35462 | -1721.0762,<br>205.1159,<br>487.6415,<br>951.1196,<br>1126.1343,<br>1348.0043,<br>1498.3344,<br>3003.3002,<br>3098.3027, | 100.0718,<br>265.4990,<br>559.0843,<br>966.4895,<br>1178.0786,<br>1402.3223,<br>1503.6295,<br>3004.2877,<br>3123.7817, | 138.0412,<br>332.6090,<br>634.4988,<br>985.7773,<br>1213.5403,<br>1421.6246,<br>1509.0076,<br>3010.8903,<br>3143.5941, | 184.2049,<br>339.1458,<br>821.8176,<br>1005.5820,<br>1231.8817,<br>1430.2094,<br>1513.8061,<br>3035.9784,<br>3148.1825, | 189.2120,<br>391.3784,<br>913.1387,<br>1015.3752,<br>1281.6233,<br>1443.6957,<br>1520.3438,<br>3054.2884,<br>3085.5503, |                                                                                                                        |
